# Supplementary material for: Femto- to micro-second photobehavior of photosensitizer drug trapped within a cyclodextrin dimer
Source: Royal Society of Chemistry journal article supplement (doi:10.1039/c3pp50179e), 2013-09-03
Supplement: c3pp50179e.pdf [file c3pp50179e.pdf]

---

**Supporting Information**

**Femto- to Micro-second Photobehavior of Photosensitizer**

**Drug Trapped within a Cyclodextrin Dimer**

Yilun Wang,<sup>1</sup> Boiko Cohen,<sup>1</sup> Ahmet Aykaç<sup>2</sup>, Antonio Vargas-Berenguel<sup>2</sup> and Abderrazzak Douhal<sup>1\*</sup>

<sup>1</sup>Departamento de Química Física, Facultad de Ciencias Ambientales y Bioquímica, and INAMOL, Universidad de Castilla-La Mancha, Avenida Carlos III, S/N, 45071 Toledo, Spain.

<sup>2</sup>Departamento de Química y Física, Universidad de Almería, Carretera de Sacramento, 04120, Almería, Spain.

\*corresponding author: [Abderrazzak.Douhal@uclm.es](mailto:Abderrazzak.Douhal@uclm.es)

Fax number: +34-925-268840

Phone number: +34-925-265717

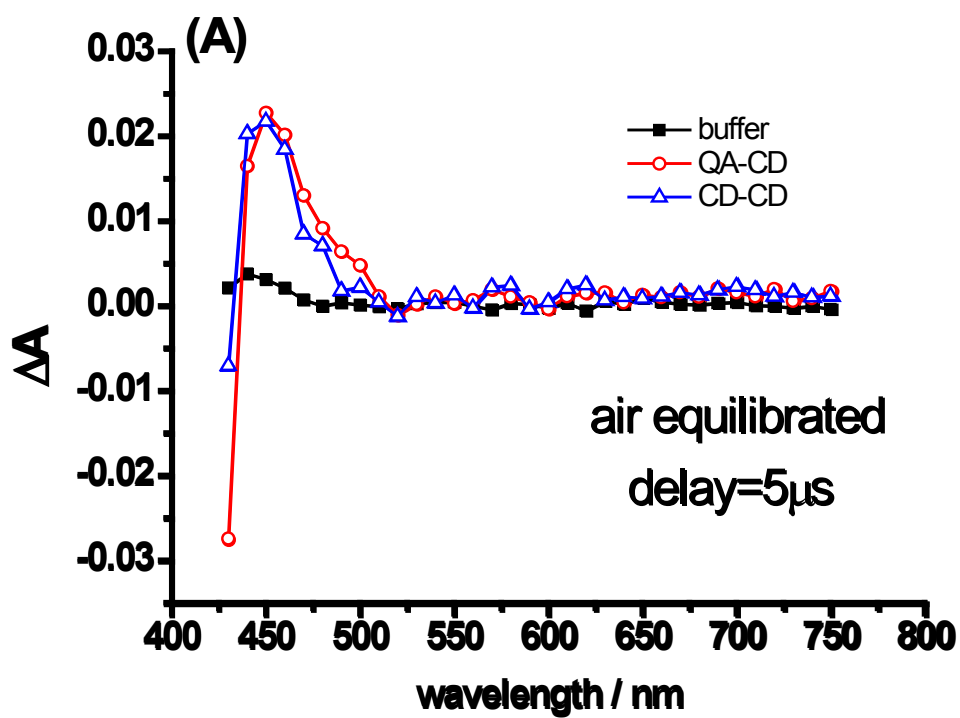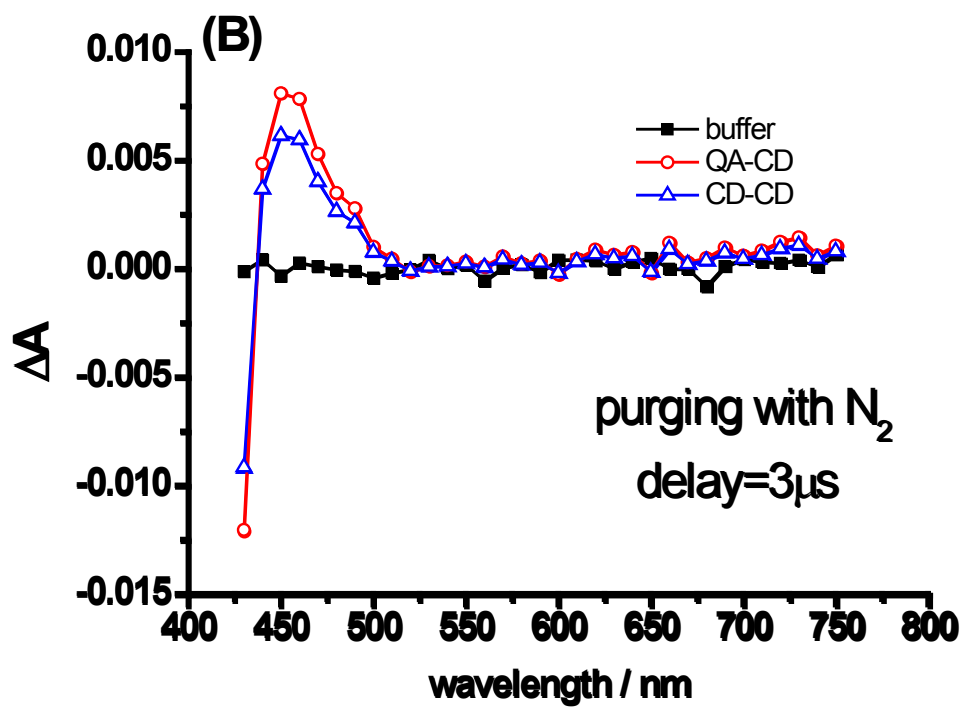

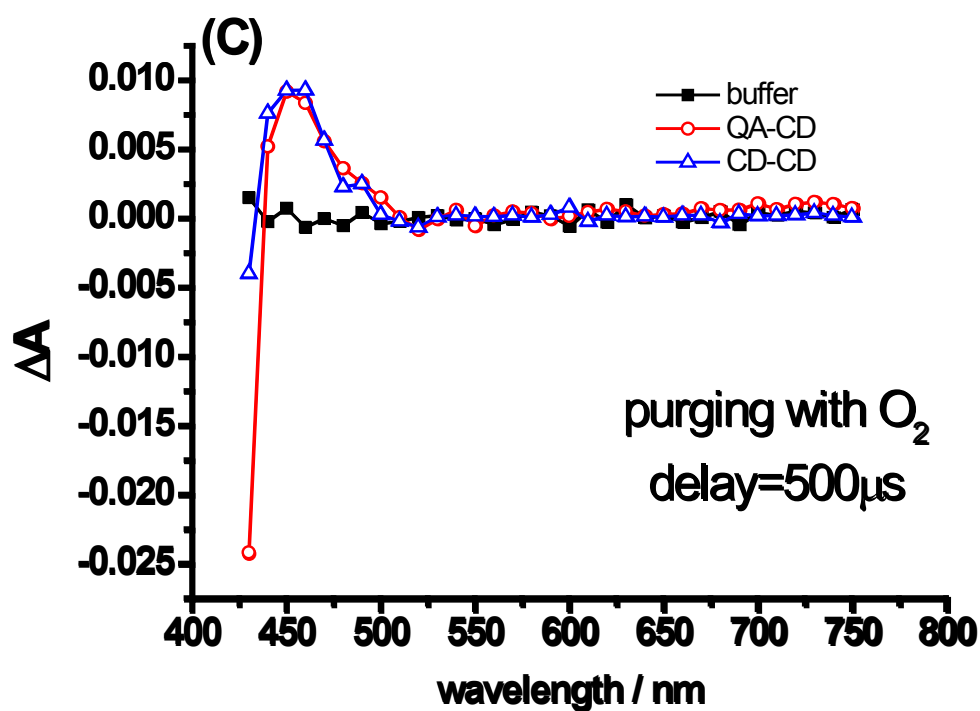

**Figure S1.** Transient uv-visible absorption spectra of TSPP in (■) buffer (pH=7), (○) in presence of 10 mM QA- $\beta$ -CD<sup>a</sup>, and (Δ) in 10  $\mu$ M CD-CD under different concentrations of molecular oxygen: (A) air equilibrated and recorded at 5  $\mu$ s delay, (B) deoxygenated (purging with N<sub>2</sub>) and recorded at 3  $\mu$ s delay, and (C) saturated with molecular oxygen (purging with O<sub>2</sub>) and recorded at 500  $\mu$ s delay. The excitation wavelength was 415 nm for TSPP in buffer and 420 nm for others. <sup>a</sup> From ref. 1

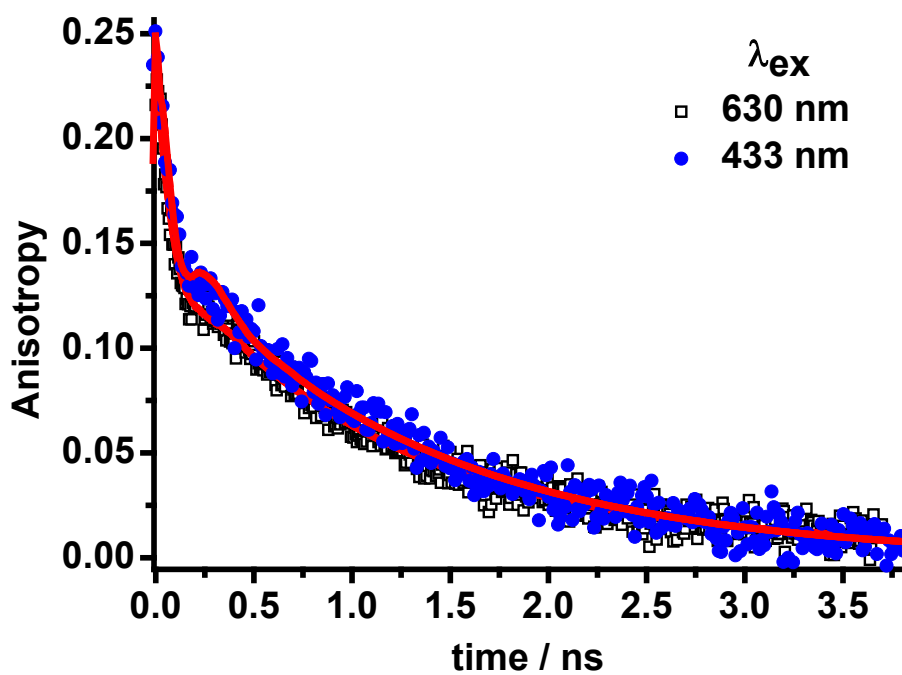

**Figure S2.** Emission anisotropy decays of TSPP in presence of 10  $\mu\text{M}$  of CD-CD, excited at ( $\square$ ) 433 and ( $\bullet$ ) 630 nm, and collected at 650 nm. The solid lines represent the best fits using two-exponential function.

## Binding constant determination

To determine the binding constant between TSPP, CD-CD, and the complexes, we used equations 1-7, which assume a 1:1 stoichiometry of the complexes. We took into consideration the fact that the host (CD-CD) is not in very large excess compared to the guest (TSPP). The equilibrium constant is expressed by the following equation:

$$K_e = \frac{[TSPP : CD - CD]}{[TSPP][CD - CD]} \quad (1)$$

The concentrations of free HPTS and HSA can be described by

$$[TSPP] = [TSPP]_T - [TSPP : CD - CD] \quad (2)$$

$$[CD - CD] = [CD - CD]_T - [TSPP : CD - CD] \quad (3)$$

where  $[TSPP]_T$  and  $[CD-CD]_T$  are the total concentrations of TSPP and CD-CD, respectively.

The concentration of the complex is given by

$$[TSPP : CD - CD] = \frac{1}{2} [([TSPP]_T + [CD - CD]_T + K_e^{-1}) \pm \sqrt{([TSPP]_T + [CD - CD]_T + K_e^{-1})^2 - 4[TSPP]_T[CD - CD]_T}] \quad (4)$$

The following equations relate the absorbance measurements of the bimolecular equilibrium:

$$\frac{\Delta A}{A_1 - A_0} = \frac{[TSPP : CD - CD]_i}{[TSPP : CD - CD]_s} = \frac{[TSPP : CD - CD]}{[TSPP]} \quad (5)$$

$$\Delta A = \frac{(A_1 - A_0) \times [TSPP : CD - CD]}{[TSPP]} \quad (6)$$

where  $\Delta A$  is the absorbance change of HPTS produced by the binding of increasing quantities of CD-CD,  $A_0$  is the absorbance of TSPP without CD-CD,  $A_1$  is the absorbance of TSPP forming 1:1 complex with CD-CD.  $[TSPP:CD-CD]_i$  is the concentration of the complex as varying quantities ( $i$ ) of CD-CD are added to a constant amount of TSPP, and  $[TSPP:CD-CD]_s$  is the concentration of the complex at saturation of HSA. Substituting eq 4 into eq 6 yields the final equation:

$$\Delta A = \frac{A_1 - A_0}{2 \times [TSPP]} \times \left[ (K_e^{-1} + [TSPP] + [CD - CD]) - \sqrt{(K_e^{-1} + [TSPP] + [CD - CD])^2 - 4 \times [TSPP] \times [CD - CD]} \right] \quad (7)$$
